# Supplementary material for: Association Mapping for Fruit, Plant and Leaf Morphology Traits in Eggplant
Source: PubMed Central journal article supplement (PMC4540451; doi:10.1371/journal.pone.0135200), 2015-08-18

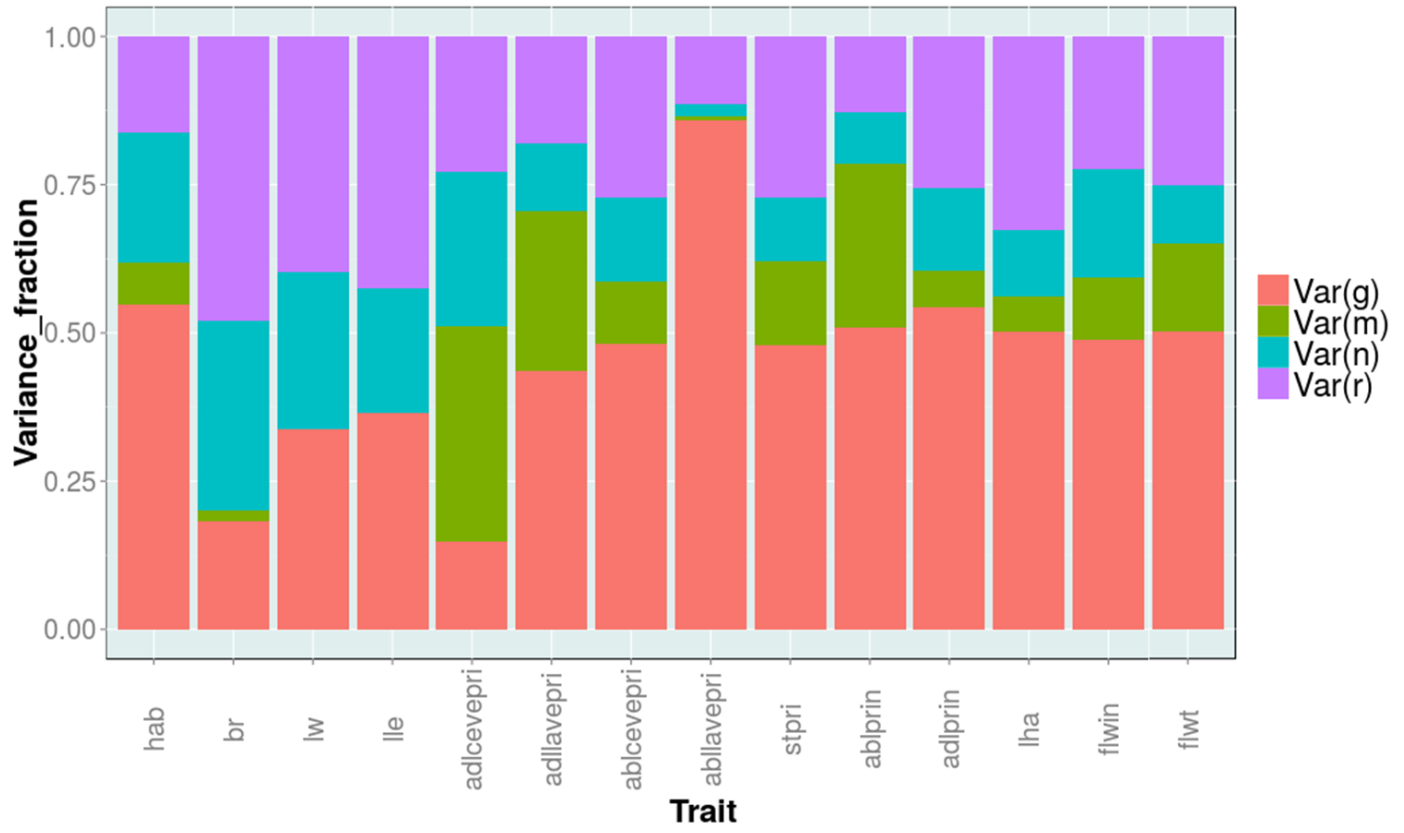

Supplement: pone.0135200.s002.pdf [file pone.0135200.s002.pdf]
