# Supplementary material for: Association Mapping for Fruit, Plant and Leaf Morphology Traits in Eggplant
Source: PubMed Central journal article supplement (PMC4540451; doi:10.1371/journal.pone.0135200), 2015-08-18
Supplement: pone.0135200.s005.pdf [file pone.0135200.s005.pdf]

**Supplementary Table 1** - The 191 eggplant entries forming the association panel. The provenance of entries marked “EA” was from east Asia, and that of those marked “WE” from the Mediterranean Basin.

| ID     | Accession Name         | Origin        | Areal | Morphological groups <sup>1</sup> | Structure subpopulations <sup>2</sup> |
|--------|------------------------|---------------|-------|-----------------------------------|---------------------------------------|
| AM_001 | Dadali                 | Indonesia     | EA    | 1                                 | B                                     |
| AM_004 | Cima viola             | Italy         | WE    | 1                                 | A                                     |
| AM_005 | Bianca ovale           | Italy         | WE    | 2                                 | B                                     |
| AM_010 | 1F5 (9)                | Breeding line | WE    | 2                                 | A                                     |
| AM_011 | Bianca Sicilia         | Italy         | WE    | 2                                 | B                                     |
| AM_013 | CCR3                   | Breeding line | WE    | 1                                 | A                                     |
| AM_014 | Mel                    | Italy         | WE    | 2                                 | Admixture                             |
| AM_015 | Luga 063               | Italy         | WE    | 1                                 | A                                     |
| AM_016 | Prosperosa             | Italy         | WE    | 3                                 | B                                     |
| AM_018 | Lunga Violetta Cinese  | China         | EA    | 1                                 | B                                     |
| AM_021 | Tal 1/1                | Italy         | WE    | 1                                 | A                                     |
| AM_022 | Angiò 4                | China         | EA    | 1                                 | B                                     |
| AM_023 | BLK 1269               | Breeding line | WE    | 2                                 | A                                     |
| AM_024 | GIC/ 27-9              | Breeding line | WE    | 2                                 | A                                     |
| AM_025 | Tina                   | Italy         | WE    | 1                                 | A                                     |
| AM_026 | DR2                    | Italy         | WE    | 1                                 | A                                     |
| AM_028 | TBE84 D                | Breeding line | WE    | 2                                 | A                                     |
| AM_029 | FanE13 D               | Breeding line | WE    | 2                                 | A                                     |
| AM_030 | FanE27 D               | Breeding line | WE    | 2                                 | A                                     |
| AM_031 | FanE63 D               | Breeding line | WE    | 2                                 | A                                     |
| AM_032 | SNL 534-11             | India         | EA    | 3                                 | B                                     |
| AM_033 | SNL 533-8              | India         | EA    | 3                                 | B                                     |
| AM_034 | SNL 600-1              | India         | EA    | 2                                 | B                                     |
| AM_035 | Cin 01/ 24-6           | China         | EA    | 2                                 | B                                     |
| AM_036 | Viola Cin-A-1          | China         | EA    | 2                                 | B                                     |
| AM_037 | Violetta di toscana    | Italy         | WE    | 3                                 | B                                     |
| AM_038 | Bellezza nera          | Italy         | WE    | 2                                 | A                                     |
| AM_040 | Violetta di Metaponto  | Italy         | WE    | 3                                 | B                                     |
| AM_041 | 28-08/3 (23-09)        | Breeding line | WE    | 3                                 | B                                     |
| AM_042 | 31-08/4 (25-09)        | Breeding line | WE    | 3                                 | B                                     |
| AM_043 | 51-08/4 (29-09)        | Breeding line | WE    | 3                                 | B                                     |
| AM_044 | 52-08/4 (30-09)        | Breeding line | WE    | 3                                 | B                                     |
| AM_045 | 55-08/5 (31-09)        | Breeding line | WE    | 3                                 | B                                     |
| AM_046 | 16-09 ( <u>15-12</u> ) | Breeding line | WE    | 3                                 | B                                     |
| AM_047 | P621-08                | Breeding line | WE    | 3                                 | B                                     |
| AM_048 | P623-08                | Breeding line | WE    | 3                                 | B                                     |
| AM_049 | P645-08                | Breeding line | WE    | 3                                 | B                                     |
| AM_050 | P649-08                | Breeding line | WE    | 3                                 | B                                     |
| AM_051 | P612-08                | Breeding line | WExEA | 3                                 | B                                     |
| AM_052 | P390                   | Breeding line | WExEA | 3                                 | B                                     |
| AM_053 | P328                   | Breeding line | WExEA | 3                                 | B                                     |
| AM_054 | P656-08                | Breeding line | WE    | 3                                 | B                                     |
| AM_055 | msp 73-08              | Breeding line | WE    | 2                                 | A                                     |
| AM_056 | S 1052-08              | Breeding line | WE    | 1                                 | A                                     |
| AM_057 | LI324/06               | Italy         | WE    | 1                                 | A                                     |
| AM_058 | msp 36-08              | Italy         | WE    | 1                                 | A                                     |
| AM_059 | msp 42-08              | Italy         | WE    | 1                                 | A                                     |
| AM_060 | msp 30-08              | Italy         | WE    | 1                                 | A                                     |
| AM_062 | msp 55-08              | Italy         | WE    | 1                                 | A                                     |
| AM_063 | L422-08                | Italy         | WE    | 1                                 | A                                     |
| AM_064 | L717-289               | Italy         | WE    | 1                                 | A                                     |

|        |                                 |               |    |   |           |
|--------|---------------------------------|---------------|----|---|-----------|
| AM_067 | Uga                             | Italy         | WE | 2 | A         |
| AM_068 | Tana                            | Italy         | WE | 1 | A         |
| AM_069 | Bin 6                           | Italy         | WE | 2 | A         |
| AM_070 | Floralba                        | Italy         | WE | 2 | Admixture |
| AM_071 | Ind Min                         | India         | EA | 1 | Admixture |
| AM_072 | SM5/2                           | Breeding line | WE | 2 | Admixture |
| AM_073 | SM5/13                          | Breeding line | WE | 2 | A         |
| AM_074 | SM5/22                          | Breeding line | WE | 1 | A         |
| AM_076 | S.Nicandro                      | Italy         | WE | 2 | A         |
| AM_086 | LS 3805 minden                  | Japan         | EA | 2 | B         |
| AM_098 | CIN6                            | China         | EA | 3 | B         |
| AM_099 | CIN5                            | China         | EA | 3 | B         |
| AM_100 | CIN7                            | China         | EA | 3 | B         |
| AM_102 | CIN9                            | China         | EA | 3 | B         |
| AM_103 | LS611                           | Japan         | EA | 2 | Admixture |
| AM_106 | Naga-Ungu                       | Indonesia     | EA | 1 | B         |
| AM_114 | N 258-4                         | India         | EA | 1 | Admixture |
| AM_121 | Indom melanz                    | Indonesia     | EA | 2 | Admixture |
| AM_124 | PI17                            | Italy         | WE | 2 | A         |
| AM_126 | Almagro                         | Spain         | WE | 2 | A         |
| AM_127 | Larga negra                     | Spain         | WE | 1 | A         |
| AM_128 | Listada                         | Spain         | WE | 2 | A         |
| AM_129 | Tolga                           | Algeria       | WE | 2 | A         |
| AM_133 | Black Beauty                    | Italy         | WE | 2 | A         |
| AM_134 | Viserba                         | Italy         | WE | 1 | A         |
| AM_135 | Black Beauty                    | Italy         | WE | 2 | A         |
| AM_136 | Tonda Violetta Firenze          | Italy         | WE | 2 | B         |
| AM_137 | Violetta Lunga Romagna          | Italy         | WE | 1 | A         |
| AM_138 | Barbentane                      | France        | WE | 1 | A         |
| AM_139 | Lunga Marina                    | Italy         | WE | 1 | A         |
| AM_140 | Tonda di Valence                | France        | WE | 3 | B         |
| AM_141 | Lunga Violetta Scura Cannellina | Italy         | WE | 1 | A         |
| AM_142 | Tonda Black Beauty              | Italy         | WE | 2 | A         |
| AM_143 | Bellezza Nera                   | Italy         | WE | 2 | A         |
| AM_144 | Lunga Violetta Napoli           | Italy         | WE | 1 | A         |
| AM_146 | Black Beauty                    | Italy         | WE | 2 | A         |
| AM_147 | Violetta Mostruosa NY           | Italy         | WE | 2 | A         |
| AM_148 | Slim Jim                        | India         | EA | 1 | Admixture |
| AM_149 | Tonda Violetta Scura Valence    | France        | WE | 3 | B         |
| AM_150 | Grossissima Violetta Firenze    | Italy         | WE | 2 | B         |
| AM_151 | Violetta Lunga                  | Italy         | WE | 1 | A         |
| AM_152 | Tonda Bianca                    | Italy         | WE | 2 | Admixture |
| AM_153 | Prosperosa                      | Italy         | WE | 3 | A         |
| AM_155 | Daejang                         | China         | EA | 1 | B         |
| AM_156 | Buia                            | Italy         | WE | 2 | A         |
| AM_157 | Baffa                           | Italy         | WE | 2 | A         |
| AM_158 | Ank2                            | India         | EA | 2 | A         |
| AM_159 | CN2                             | China         | EA | 3 | B         |
| AM_160 | Dourga                          | France        | WE | 2 | A         |
| AM_162 | Tunisia Baharia                 | Italy         | WE | 3 | B         |
| AM_163 | Pusa Purple Cluster             | India         | EA | 1 | Admixture |
| AM_167 | Angio 3                         | China         | EA | 1 | B         |
| AM_168 | Angio 5                         | China         | EA | 2 | B         |
| AM_169 | Bianca striata verde            | Italy         | WE | 2 | Admixture |
| AM_170 | SM19/14                         | Breeding line | WE | 2 | A         |
| AM_171 | Palermitana                     | Italy         | WE | 3 | B         |

|        |                                   |                    |       |   |           |
|--------|-----------------------------------|--------------------|-------|---|-----------|
| AM_173 | Pusa Purple Long                  | India              | EA    | 1 | Admixture |
| AM_174 | JM (Slim Jim)                     | India              | EA    | 1 | Admixture |
| AM_175 | Cannellina Sarnense               | Italy              | WE    | 1 | A         |
| AM_176 | Sita                              | Italy              | WE    | 2 | Admixture |
| AM_177 | FiL white                         | Turchia            | WE    | 2 | Admixture |
| AM_178 | Lunga napoli                      | Italy              | WE    | 1 | A         |
| AM_179 | 1237/06                           | Italy              | WE    | 1 | A         |
| AM_180 | Listada Tacconi                   | Italy              | WE    | 2 | A         |
| AM_181 | Suraj(143)                        | India              | EA    | 2 | Admixture |
| AM_182 | Pusa Round                        | India              | EA    | 2 | Admixture |
| AM_183 | Chaojiuye Yuanquie                | China              | EA    | 3 | B         |
| AM_184 | He Shanwang                       | China              | EA    | 3 | B         |
| AM_185 | TAI 440                           | Indochinese Region | EA    | 3 | B         |
| AM_187 | Naveen                            | India              | EA    | 2 | Admixture |
| AM_188 | TAI 444                           | Indochinese Region | EA    | 2 | Admixture |
| AM_189 | TAI 445                           | Indochinese Region | EA    | 1 | Admixture |
| AM_190 | TAI 446                           | Indochinese Region | EA    | 1 | Admixture |
| AM_191 | TAI 449                           | China              | EA    | 3 | B         |
| AM_193 | TAI 453                           | Indochinese Region | EA    | 2 | A         |
| AM_194 | TAI 455                           | Thailand           | EA    | 2 | Admixture |
| AM_195 | TAI 456                           | Myanmar            | EA    | 2 | Admixture |
| AM_196 | TAI 457                           | India              | EA    | 2 | Admixture |
| AM_198 | TH 6413 Raos                      | Indonesia          | EA    | 1 | Admixture |
| AM_199 | TAI 470                           | Thailand           | EA    | 2 | Admixture |
| AM_200 | TAI 475                           | Thailand           | EA    | 2 | Admixture |
| AM_201 | TAI 477                           | Thailand           | EA    | 2 | Admixture |
| AM_202 | TAI 480                           | India              | EA    | 2 | Admixture |
| AM_203 | TAI 481                           | China              | EA    | 1 | B         |
| AM_204 | TAI 483                           | India              | EA    | 1 | Admixture |
| AM_205 | TAI 484                           | India              | EA    | 1 | Admixture |
| AM_206 | 7 CN                              | China              | EA    | 3 | B         |
| AM_207 | 9 CN                              | China              | EA    | 3 | B         |
| AM_208 | 17 CN                             | China              | EA    | 1 | B         |
| AM_210 | 67-3                              | Breeding line      | WExEA | 3 | B         |
| AM_211 | 305 E40                           | Breeding line      | WE    | 1 | A         |
| AM_212 | CGN17464 (PI 176759)              | Turkey             | WE    | 2 | A         |
| AM_213 | CGN23345 (PI 169641)              | Turkey             | WE    | 2 | A         |
| AM_214 | CGN18783 (Croisette)              | France             | WE    | 1 | B         |
| AM_215 | CGN18531 (Patchem)                | Turkey             | WE    | 1 | B         |
| AM_217 | CGN17449 (Topak; PI 175917)       | Turkey             | WE    | 2 | A         |
| AM_218 | CGN17451 (Dolmalik; PI 176758)    | Turkey             | WE    | 2 | A         |
| AM_221 | CGN17579 (PI 169648)              | Turkey             | WE    | - | A         |
| AM_222 | CGN23346 (Topatan; PI 169649)     | Turkey             | WE    | 2 | A         |
| AM_224 | CGN17581 (PI 169651)              | Turkey             | WE    | 1 | A         |
| AM_228 | CGN23343 (PI 167328)              | Turkey             | WE    | 1 | A         |
| AM_230 | CGN23344 (Bostan; PI 169639)      | Turkey             | WE    | 2 | A         |
| AM_231 | CGN18591 (PI 171847)              | Turkey             | WE    | 2 | A         |
| AM_232 | CGN18595 (PI 171852)              | Turkey             | WE    | 1 | A         |
| AM_233 | CGN18779 (De Barbentane)          | France             | WE    | 1 | A         |
| AM_234 | CGN23309 (Dolg; PI 358232)        | Macedonia          | WE    | 1 | A         |
| AM_235 | CGN18484 (Morska Pata; PI 358242) | Macedonia          | WE    | 1 | Admixture |
| AM_236 | CGN18782 (Violette Longue Hative) | France             | WE    | 1 | A         |
| AM_238 | CGN17453 (Yesilkoy 27)            | Turkey             | WE    | 1 | A         |
| AM_240 | CGN18578 (Kemer; PI 169655)       | Turkey             | WE    | - | A         |
| AM_241 | CGN23348 (PI 169658)              | Turkey             | WE    | 1 | A         |
| AM_243 | CGN18585 (PI 169663)              | Turkey             | WE    | 1 | A         |

|        |                                 |               |    |   |           |
|--------|---------------------------------|---------------|----|---|-----------|
| AM_249 | CGN23351 (PI 174362)            | Turkey        | WE | 2 | A         |
| AM_251 | CGN24467 (Berenjena Listada)    | Spain         | WE | 2 | A         |
| AM_252 | CGN18505 (Berenjena Redonda)    | Spain         | WE | 3 | B         |
| AM_253 | CGN24468 (Caminal)              | France        | WE | 1 | A         |
| AM_257 | CGN18776 (Longue Hative)        | France        | WE | 1 | A         |
| AM_258 | CGN17456 (Monda)                | France        | WE | 2 | Admixture |
| AM_259 | CGN23315 (Ronde de Valence)     | France        | WE | 3 | B         |
| AM_260 | CGN17479 (Semiredonda Jaspeada) | Spain         | WE | 2 | A         |
| AM_262 | CGN23772                        | Nigeria       | WE | 2 | Admixture |
| AM_264 | Mezza Lunga Violetta            | Italy         | WE | 1 | A         |
| AM_265 | Lunghissima Precoce Violetta    | Italy         | WE | 1 | A         |
| AM_266 | Dingaras                        | China         | EA | 1 | B         |
| AM_268 | L 129                           | Indonesia     | EA | 1 | B         |
| AM_269 | Talindo                         | Indonesia     | EA | 1 | B         |
| AM_271 | DS1                             | Breeding line | WE | 2 | A         |
| AM_273 | DS2                             | Breeding line | WE | 2 | A         |
| AM_274 | DS4                             | Breeding line | WE | 2 | A         |
| AM_275 | 1 CAAS                          | China         | EA | 3 | B         |
| AM_278 | 4 CAAS                          | China         | EA | 3 | B         |
| AM_279 | 5 CAAS                          | China         | EA | 3 | B         |
| AM_284 | 10 CAAS                         | China         | EA | 1 | A         |
| AM_285 | 11 CAAS                         | China         | EA | 1 | B         |
| AM_288 | 14 CAAS                         | China         | EA | 2 | A         |
| AM_289 | 15 CAAS                         | China         | EA | 3 | B         |
| AM_290 | 16 CAAS                         | China         | EA | 3 | B         |
| AM_291 | 17 CAAS                         | China         | EA | 3 | B         |
| AM_292 | 18 CAAS                         | China         | EA | 1 | B         |
| AM_293 | 19 CAAS                         | China         | EA | 1 | B         |

<sup>1</sup> Morphological groups (1: long, light, curved fruits; 2: oblong fruits of intermediate weight; 3: round, heavy fruits) as defined by Cericola et al. 2013.

<sup>2</sup> Structure subpopulations based on SNP genotyping performed by Cericola et al. 2014. According to the level of membership provided by *STRUCTURE* software, each accession was assigned to a sub-group (A or B) when its level of membership was higher than 70%; The accessions with ambiguous membership were classified as admixed.
