# Supplementary material for: Association Mapping for Fruit, Plant and Leaf Morphology Traits in Eggplant
Source: PubMed Central journal article supplement (PMC4540451; doi:10.1371/journal.pone.0135200), 2015-08-18
Supplement: pone.0135200.s006.pdf [file pone.0135200.s006.pdf]

**Supplementary Table 2.** BLAST corresponding Solyc (*Solanum lycopersicum*) gene sequences and annotation for marker sequences in eggplant association groups

| Chrom.         | Group              | Solyc gene                                                                                                                                         | Annotation result                                                                                                                                                 |
|----------------|--------------------|----------------------------------------------------------------------------------------------------------------------------------------------------|-------------------------------------------------------------------------------------------------------------------------------------------------------------------|
| <b>E01-T01</b> | <b>E01.1</b>       | Solyc01g086710.2.1                                                                                                                                 | DNA-directed RNA polymerase (AHRD V1 ***- B9SVH7_RICCO); contains Interpro domain(s) IPR015712 DNA-directed RNA polymerase, subunit 2                             |
|                | <b>E01.1</b>       | Solyc01g086720.2.1                                                                                                                                 | Phosphoribosylanthranilate transferase (Fragment) (AHRD V1 *--- Q43085_PEA); contains Interpro domain(s) IPR013583 Phosphoribosyltransferase C-terminal, plant    |
|                | <b>E01.1</b>       | Solyc01g088090.2.1                                                                                                                                 | Hydrolase alpha/beta fold family protein (AHRD V1 ***- D7M5W5_ARALY); contains Interpro domain(s) IPR000073 Alpha/beta hydrolase fold-1                           |
|                | <b>E01.2</b>       | Solyc01g095610.2.1                                                                                                                                 | Leaf senescence protein-like (AHRD V1 ***- Q654T8_ORYSJ); contains Interpro domain(s) IPR004253 Protein of unknown function DUF231, plant                         |
|                | <b>E01.3</b>       | Solyc01g102700.2.1                                                                                                                                 | Receptor like kinase, RLK                                                                                                                                         |
|                | <b>E01.3</b>       | Solyc01g102800.2.1                                                                                                                                 | Histidyl-tRNA synthetase (AHRD V1 *-*- Q52NV4_HUMAN); contains Interpro domain(s) IPR015807 Histidyl-tRNA synthetase, class IIa, subgroup                         |
| <b>E02-T02</b> | <b>E02.1</b>       | Solyc02g068380.2.1                                                                                                                                 | N-carbamoyl-L-amino-acid amidohydrolase (AHRD V1 **-- Q1LHR1_RALME); contains Interpro domain(s) IPR010158 Amidase, hydantoinase/carbamoylase                     |
|                | <b>E02.1</b>       | Solyc02g068880.1.1                                                                                                                                 | Receptor-interacting serine/threonine-protein kinase 2 (AHRD V1 **** RIPK2_MOUSE); contains Interpro domain(s) IPR002290 Serine/threonine protein kinase          |
|                | <b>E02.1</b>       | Solyc02g075620.2.1                                                                                                                                 | Pectinesterase (AHRD V1 **** B9SZT7_RICCO); contains Interpro domain(s) IPR000070 Pectinesterase, catalytic                                                       |
|                | <b>E02.1</b>       | Solyc02g077640.1.1                                                                                                                                 | Unkonwn                                                                                                                                                           |
|                | <b>E02.1</b>       | Solyc02g077780.2.1                                                                                                                                 | Necrotic spotted lesions 1 (Fragment) (AHRD V1 *-*- B6ZA38_HELPE); contains Interpro domain(s) IPR001862 Membrane attack complex component/perforin/complement C9 |
|                | <b>E02.1</b>       | Solyc02g078200                                                                                                                                     | 50S ribosomal protein L21 (AHRD V1 *-*- B6TJJ8_MAIZE); contains Interpro domain(s) IPR001787 Ribosomal protein L21                                                |
|                | <b>E02.1</b>       | Solyc02g079360.1.1                                                                                                                                 | Octicosapeptide/Phox/Bem1p domain-containing protein (AHRD V1 *--- D7L8F8_ARALY); contains Interpro domain(s) IPR000270 Octicosapeptide/Phox/Bem1p                |
|                | <b>E02.1</b>       | Solyc02g079770.2                                                                                                                                   | DAG protein (AHRD V1 ***- B6TYI4_MAIZE)                                                                                                                           |
|                | <b>E02.1</b>       | Solyc02g080340.2.1                                                                                                                                 | Patatin-like phospholipase family protein (AHRD V1 *-*- A8PYJ4_BRUMA); contains Interpro domain(s) IPR002641 Patatin                                              |
|                | <b>E02.1</b>       | Solyc02g080580.1.1                                                                                                                                 | Nuclear protein (AHRD V1 *-*- B6U7S5_MAIZE); contains Interpro domain(s) IPR007608 Protein of unknown function DUF584                                             |
|                | <b>E02.1</b>       | Solyc02g081030.2.1                                                                                                                                 | Uncharacterized membrane protein C2G11.09 (AHRD V1 **-- YAB9_SCHPO); contains Interpro domain(s) IPR003864 Protein of unknown function DUF221                     |
|                | <b>E02.1</b>       | Solyc02g083090.1.1                                                                                                                                 | CM0216.330.nc protein (AHRD V1 ***- B0BLI1_LOTJA); contains Interpro domain(s) IPR004320 Protein of unknown function DUF241, plant                                |
|                | <b>E02.2</b>       | Solyc02g085470.2.1                                                                                                                                 | Transcription initiation factor IIB (AHRD V1 *-*- B5XD83_SALSA); contains Interpro domain(s) IPR000812 Transcription factor TFIIB related                         |
|                | <b>E02.2</b>       | Solyc02g085840.2                                                                                                                                   | UV excision repair protein RAD23 (AHRD V1 ***- B6JX15_SCHJY); contains Interpro domain(s) IPR000626 Ubiquitin                                                     |
|                | <b>E02.2</b>       | Solyc02g086340.2.1                                                                                                                                 | LisH domain and HEAT repeat-containing protein KIAA1468 (AHRD V1 *-*- K1468_HUMAN); contains Interpro domain(s) IPR011989 Armadillo-like helical                  |
|                | <b>E02.2</b>       | Solyc02g086350.2.1                                                                                                                                 | Protein PLASTID MOVEMENT IMPAIRED 2 (AHRD V1 ***- PMI2_ARATH); contains Interpro domain(s) IPR008545 Protein of unknown function DUF827, plant                    |
| <b>E02.2</b>   | Solyc02g086360.2.1 | Octicosapeptide/Phox/Bem1p domain-containing protein (AHRD V1 *--- D7L8F8_ARALY); contains Interpro domain(s) IPR000270 Octicosapeptide/Phox/Bem1p |                                                                                                                                                                   |

|                |              |                    |                                                                                                                                                                                                       |
|----------------|--------------|--------------------|-------------------------------------------------------------------------------------------------------------------------------------------------------------------------------------------------------|
|                | <b>E02.3</b> | Solyc02g088610.2.1 | ATP-dependent chaperone ClpB (AHRD V1 **** B5W0X8_SPIMA); contains Interpro domain(s) IPR017730 Chaperonin ClpB                                                                                       |
|                | <b>E02.3</b> | Solyc02g088690.2.1 | UDP-glucose 6-dehydrogenase (AHRD V1 **** B6TBY8_MAIZE); contains Interpro domain(s) IPR001732 UDP-glucose/GDP-mannose dehydrogenase, N-terminal                                                      |
|                | <b>E02.3</b> | Solyc02g088770.2.1 | Mitochondrial carrier protein expressed (AHRD V1 ***- Q6AVS9_ORYSJ); contains Interpro domain(s) IPR001993 Mitochondrial substrate carrier                                                            |
|                | <b>E02.3</b> | Solyc02g088910.2.1 | Ninja-family protein 3 (AHRD V1 ***- NNJA3_WHEAT); contains Interpro domain(s) IPR012463 Protein of unknown function DUF1675                                                                          |
|                | <b>E02.3</b> | Solyc02g089260.2.1 | E3 ubiquitin-protein ligase UBR4 (AHRD V1 *--- UBR4_HUMAN); contains Interpro domain(s) IPR013993 Zinc finger, N-recogin, metazoa                                                                     |
|                | <b>E02.3</b> | Solyc02g090410.2.1 | LOB domain family protein (AHRD V1 ***- D7LG10_ARALY); contains Interpro domain(s) IPR004883 Lateral organ boundaries, LOB                                                                            |
|                | <b>E02.3</b> | Solyc02g093800.2.1 | Serine/threonine-protein phosphatase 2A regulatory subunit delta 1 isoform (AHRD V1 ***- Q0CAR1_ASPTN); contains Interpro domain(s) IPR002554 Protein phosphatase 2A, regulatory B subunit, B56       |
| <b>E03-T03</b> | <b>E03.1</b> | Solyc03g114640.2.1 | Signal peptide peptidase SppA type (AHRD V1 ***- Q01NK5_SOLUE); contains Interpro domain(s) IPR004635 Peptidase S49, SppA                                                                             |
|                | <b>E03.1</b> | Solyc03g114690.2.1 | Wd-40 repeat-containing protein (AHRD V1 *--- B8C836_THAPS); contains Interpro domain(s) IPR017986 WD40 repeat, region                                                                                |
|                | <b>E03.1</b> | Solyc03g115000.2.1 | AT1G74160 protein (Fragment) (AHRD V1 *-*- B9DHP4_ARATH)                                                                                                                                              |
|                | <b>E03.2</b> | Solyc03g117690.2.1 | Aspartic proteinase nepenthesin-1 (AHRD V1 ***- C0JA51_9ORYZ); contains Interpro domain(s) IPR001461 Peptidase A1                                                                                     |
|                | <b>E03.2</b> | Solyc03g117740.2   | Chloroplast At1g16080 protein (Fragment) (AHRD V1 *-*- Q1HRY1_SOLLC)                                                                                                                                  |
|                | <b>E03.2</b> | Solyc03g117970.2.1 | Novel protein similar to vertebrate ADP-ribosyltransferase (NAD+ poly (ADP-ribose) polymerase) (ADPRT) (AHRD V1 **** Q5RHR0_DANRE); contains Interpro domain(s) IPR008288 NAD+ ADP-ribosyltransferase |
|                | <b>E03.2</b> | Solyc03g117970.2.1 | Novel protein similar to vertebrate ADP-ribosyltransferase (NAD+ poly (ADP-ribose) polymerase) (ADPRT) (AHRD V1 **** Q5RHR0_DANRE); contains Interpro domain(s) IPR008288 NAD+ ADP-ribosyltransferase |
|                | <b>E03.2</b> | Solyc03g118090.2.1 | Calcium-binding mitochondrial carrier protein SCaMC-1 (AHRD V1 **** B5X2X8_SALSA); contains Interpro domain(s) IPR002113 Adenine nucleotide translocator 1                                            |
|                | <b>E03.2</b> | Solyc03g118210.2.1 | Os03g0851600 protein (Fragment) (AHRD V1 ***- Q0DLQ8_ORYSJ); contains Interpro domain(s) IPR017986 WD40 repeat, region                                                                                |
|                | <b>E03.2</b> | Solyc03g118920.2.1 | ATP-dependent RNA helicase A-like protein (AHRD V1 ***- Q9FF84_ARATH); contains Interpro domain(s) IPR011545 DNA/RNA helicase, DEAD/DEAH box type, N-terminal                                         |
|                | <b>E03.2</b> | Solyc03g119030.2.1 | Peroxisomal biogenesis factor 3 (AHRD V1 ***- Q28F64_XENTR); contains Interpro domain(s) IPR006966 Peroxin-3                                                                                          |
|                | <b>E03.2</b> | Solyc03g119840.2.1 | Universal stress protein family protein (AHRD V1 ***- D7KDY5_ARALY); contains Interpro domain(s) IPR006016 UspA                                                                                       |
|                | <b>E03.3</b> | Solyc03g123960.2.1 | Unknown Protein (AHRD V1)                                                                                                                                                                             |
|                | <b>E03.3</b> | Solyc03g123980.2.1 | Pumilio-like protein (AHRD V1 ***- Q9SVZ7_ARATH); contains Interpro domain(s) IPR011989 Armadillo-like helical                                                                                        |
|                | <b>E03.3</b> | Solyc03g123990     | Mitochondrial carrier protein (AHRD V1 ***- C5P8G6_COCP7); contains Interpro domain(s) IPR002067 Mitochondrial carrier protein                                                                        |
| <b>E04-T04</b> | <b>E04.2</b> | Solyc04g080790.2.1 | BEL1-like homeodomain protein 3 (AHRD V1 *--- BLH3_ARATH); contains Interpro domain(s) IPR006563 POX                                                                                                  |
|                | <b>E04.2</b> | Solyc04g082560.2.1 | Actin cytoskeleton-regulatory complex protein PAN1 (AHRD V1 *--- PAN1_MAGGR); contains Interpro domain(s) IPR011992 EF-Hand type                                                                      |
|                | <b>E04.2</b> | Solyc04g082900.2.1 | Mitotic checkpoint serine/threonine-protein kinase BUB1 (AHRD V1 *--- BUB1_MOUSE); contains Interpro domain(s) IPR013212 Mad3/BUB1 homology region 1                                                  |

|                |              |                    |                                                                                                                                                                                                    |
|----------------|--------------|--------------------|----------------------------------------------------------------------------------------------------------------------------------------------------------------------------------------------------|
| <b>E07-T07</b> | <b>E07.1</b> | Solyc07g049700.1.1 | Cc-nbs-lrr, resistance protein                                                                                                                                                                     |
|                | <b>E07.1</b> | Solyc07g052480.2.1 | Isocitrate lyase (AHRD V1 **** Q9FQD2_IPOBA); contains Interpro domain(s) IPR006254 Isocitrate lyase                                                                                               |
|                | <b>E07.1</b> | Solyc07g052690.2.1 | Beta-amylase (AHRD V1 **** Q9AT14_CASCR); contains Interpro domain(s) IPR013781 Glycoside hydrolase, subgroup, catalytic core                                                                      |
|                | <b>E07.2</b> | Solyc07g055060.2.1 | Phosphoenolpyruvate carboxylase 1 (AHRD V1 ***- O23946_GOSHI); contains Interpro domain(s) IPR015813 Pyruvate/Phosphoenolpyruvate kinase, catalytic core IPR001449 Phosphoenolpyruvate carboxylase |
|                | <b>E07.3</b> | Solyc07g056530.2.1 | Organic anion transporter (AHRD V1 *** B6U937_MAIZE); contains Interpro domain(s) IPR004853 Protein of unknown function DUF250                                                                     |
|                | <b>E07.3</b> | Solyc07g056570.1.1 | 9-cis-epoxycarotenoid dioxygenase                                                                                                                                                                  |
|                | <b>E07.3</b> | Solyc07g061920.2.1 | Glucan synthase like 3 (AHRD V1 ***- D8R8I5_SELML); contains Interpro domain(s) IPR003440 Glycosyl transferase, family 48                                                                          |
|                | <b>E07.3</b> | Solyc07g062060.2.1 | Peptide methionine sulfoxide reductase msrB (AHRD V1 ***- B6T2N3_MAIZE); contains Interpro domain(s) IPR002579 Methionine sulphoxide reductase B                                                   |
|                | <b>E07.3</b> | Solyc07g062500.2.1 | Cytochrome P450                                                                                                                                                                                    |
|                | <b>E07.3</b> | Solyc07g062600.2.1 | PHD finger family protein (AHRD V1 *--- D7MI23_ARALY); contains Interpro domain(s) IPR019787 Zinc finger, PHD-finger                                                                               |
|                | <b>E07.3</b> | Solyc07g062610.2.1 | 4-methyl-5(B-hydroxyethyl)-thiazole monophosphate biosynthesis enzyme ThiJ (AHRD V1 *--- C8T4T4_KLEPR); contains Interpro domain(s) IPR006287 DJ-1                                                 |
| <b>E08-T08</b> | <b>E08.2</b> | Solyc08g062930.1.1 | Calmodulin-binding protein (AHRD V1 **** A2I5F3_BETVU)                                                                                                                                             |
|                | <b>E08.2</b> | Solyc08g065150.1.1 | Unknown                                                                                                                                                                                            |
|                | <b>E08.2</b> | Solyc08g065260.2.1 | Ycf36 protein (AHRD V1 *- Q55866_SYNY3); contains Interpro domain(s) IPR009631 Protein of unknown function DUF1230                                                                                 |
|                | <b>E08.2</b> | Solyc08g065360.2.1 | Glutathione-regulated potassium-efflux system protein (AHRD V1 *- Q8TJ09_METAC); contains Interpro domain(s) IPR006153 Cation/H+ exchanger                                                         |
|                | <b>E08.2</b> | Solyc08g065610.2   | Vacuolar processing enzyme-1b (AHRD V1 ***- Q852T2_TOBAC); contains Interpro domain(s) IPR001096 Peptidase C13, legumain                                                                           |
|                | <b>E08.2</b> | Solyc08g065640.2.1 | Thioredoxin-like protein (AHRD V1 ***- Q2UPJ7_ASPOR); contains Interpro domain(s) IPR010400 Protein of unknown function DUF1000                                                                    |
|                | <b>E08.2</b> | Solyc08g065980.2.1 | Glycine-rich protein (AHRD V1 ***- D7M4B5_ARALY)                                                                                                                                                   |
|                | <b>E08.2</b> | Solyc08g067990.1.1 | Subtilisin-like protease (AHRD V1 ***- B6SZ82_MAIZE); contains Interpro domain(s) IPR015500 Peptidase S8, subtilisin-related                                                                       |
|                | <b>E08.3</b> | Solyc08g075490.2.1 | Carotenoid cleavage dioxygenase 4B                                                                                                                                                                 |
|                | <b>E08.3</b> | Solyc08g075630.2.1 | Cc-nbs-lrr, resistance protein                                                                                                                                                                     |
|                | <b>E08.3</b> | Solyc08g075950.1.1 | Growth-regulating factor 3 (AHRD V1 ***- B9VHC2_ORYSI); contains Interpro domain(s) IPR014977 WRC                                                                                                  |
|                | <b>E08.3</b> | Solyc08g076030.2.1 | WD-40 repeat protein (AHRD V1 *--- C7RS72_ACCPU); contains Interpro domain(s) IPR017986 WD40 repeat, region                                                                                        |
|                | <b>E08.3</b> | Solyc08g076030.2.1 | WD-40 repeat protein (AHRD V1 *--- C7RS72_ACCPU); contains Interpro domain(s) IPR017986 WD40 repeat, region                                                                                        |
|                | <b>E08.4</b> | Solyc08g078890.1.1 | At2g10940-like protein (Fragment) (AHRD V1 *- B3SKIO_ARAHA); contains Interpro domain(s) IPR013770 Plant lipid transfer protein and hydrophobic protein, helical                                   |
|                | <b>E08.4</b> | Solyc08g079470.2.1 | tRNA-modifying protein ygfZ (AHRD V1 *- YGFZ_SALTY); contains Interpro domain(s) IPR017703 Folate-binding, YgfZ                                                                                    |
|                | <b>E08.4</b> | Solyc08g080400.1.1 | GRAS family transcription factor (Fragment) (AHRD V1 *- B1Q3B1_BRACM); contains Interpro domain(s) IPR005202 GRAS transcription factor                                                             |

|                |              |                    |                                                                                                                                                                   |
|----------------|--------------|--------------------|-------------------------------------------------------------------------------------------------------------------------------------------------------------------|
|                | <b>E08.4</b> | Solyc08g081070.2.1 | Mitochondrial carrier family (AHRD V1 *-*- C1MZ50_MICPS); contains Interpro domain(s) IPR001993 Mitochondrial substrate carrier                                   |
|                | <b>E08.4</b> | Solyc08g081140.2.1 | Myc-like anthocyanin regulatory protein (AHRD V1 ***- Q675M5_9ASTE); contains Interpro domain(s) IPR001092 Basic helix-loop-helix dimerisation region bHLH        |
|                | <b>E08.4</b> | Solyc08g081320.2.1 | AP-1 complex subunit beta-1 (AHRD V1 ***- C5GH51_AJEDR); contains Interpro domain(s) IPR016342 Adaptor protein complex, beta subunit                              |
| <b>E09-T09</b> | <b>E09.2</b> | Solyc09g065240.2.1 | Patatin-like protein 3 (AHRD V1 ***- B6TPQ5_MAIZE); contains Interpro domain(s) IPR002641 Patatin                                                                 |
|                | <b>E09.2</b> | Solyc09g065720.2.1 | Peptidyl-prolyl cis-trans isomerase (AHRD V1 *-*- B9H8E5_POPTR); contains Interpro domain(s) IPR002130 Peptidyl-prolyl cis-trans isomerase, cyclophilin-type      |
|                | <b>E09.3</b> | Solyc09g075950.1.1 | Heat shock protein 1 (AHRD V1 ***- B6SXY0_MAIZE); contains Interpro domain(s) IPR013126 Heat shock protein 70                                                     |
|                | <b>E09.3</b> | Solyc09g075950.1.1 | Heat shock protein 1 (AHRD V1 ***- B6SXY0_MAIZE); contains Interpro domain(s) IPR013126 Heat shock protein 70                                                     |
| <b>E10-T10</b> | <b>E10.4</b> | Solyc10g077080.1.1 | Peroxidase 1 (AHRD V1 ***- A0SWU6_SESRO); contains Interpro domain(s) IPR002016 Haem peroxidase, plant/fungal/bacterial                                           |
|                | <b>E10.4</b> | Solyc10g078290.1.1 | Alpha-L-arabinofuranosidase (AHRD V1 ***- Q76LU4_SOLLC); contains Interpro domain(s) IPR017853 Glycoside hydrolase, catalytic core                                |
|                | <b>E10.4</b> | Solyc10g078330.1.1 | BZIP family transcription factor (Fragment) (AHRD V1 *-*- Q677A7_HYAOR); contains Interpro domain(s) IPR011616 bZIP transcription factor, bZIP-1                  |
|                | <b>E10.2</b> | Solyc10g078600.1.1 | Cyclin B-like protein (AHRD V1 ***- Q5U8T5_9SOLA); contains Interpro domain(s) IPR014400 Cyclin, A/B/D/E                                                          |
|                | <b>E10.2</b> | Solyc10g083430.1.1 | F-box family protein (AHRD V1 ***- B9MYU0_POPTR)                                                                                                                  |
|                | <b>E10.2</b> | Solyc10g083800.1.1 | Pyrimidine-specific ribonucleoside hydrolase (AHRD V1 ***- B6IUL3_RHOCS); contains Interpro domain(s) IPR001910 Inosine/uridine-preferring nucleoside hydrolase   |
| <b>E10-T12</b> | <b>E10.1</b> | Solyc12g005480.1.1 | Targeting protein for Xklp2 containing protein expressed (AHRD V1 *--- Q10Q22_ORYSJ); contains Interpro domain(s) IPR009675 Targeting for Xklp2                   |
|                | <b>E10.1</b> | Solyc12g005580.1.1 | Syntaxin (AHRD V1 ***- Q6X9V9_HORVD); contains Interpro domain(s) IPR010989 t-SNARE                                                                               |
|                | <b>E10.1</b> | Solyc12g014120.1.1 | Unknown Protein (AHRD V1)                                                                                                                                         |
| <b>E11-T11</b> | <b>E11.1</b> | Solyc11g006060.1.1 | Homology to unknown gene (AHRD V1 ***- Q00S02_OSTTA)                                                                                                              |
|                | <b>E11.1</b> | Solyc11g006680.1.1 | Pentatricopeptide repeat-containing protein (AHRD V1 ***- D7LY59_ARALY); contains Interpro domain(s) IPR000504 RNA recognition motif, RNP-1                       |
|                | <b>E11.2</b> | Solyc11g010610.1.1 | Small conductance mechanosensitive (MscS-family) ion channel (AHRD V1 *-*- Q31G33_THICR); contains Interpro domain(s) IPR006685 Mechanosensitive ion channel MscS |
| <b>E12-T11</b> | <b>E12.2</b> | Solyc11g071430.1.1 | Cc-nbs-lrr, resistance protein                                                                                                                                    |
